# Supplementary material
Source: publisher figshare collection journal article supplement (https://acs.figshare.com/ndownloader/files/5759634)
Supplement: Supplementary file 1 [file 5759634]

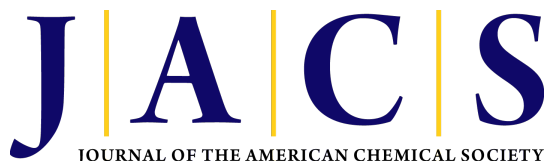

JOURNAL OF THE AMERICAN CHEMICAL SOCIETY

J. Am. Chem. Soc., 1998, 120(30), 7635-7636, DOI:[10.1021/ja9808346](https://doi.org/10.1021/ja9808346)

#### Terms & Conditions

Electronic Supporting Information files are available without a subscription to ACS Web Editions. The American Chemical Society holds a copyright ownership interest in any copyrightable Supporting Information. Files available from the ACS website may be downloaded for personal use only. Users are not otherwise permitted to reproduce, republish, redistribute, or sell any Supporting Information from the ACS website, either in whole or in part, in either machine-readable form or any other form without permission from the American Chemical Society. For permission to reproduce, republish and redistribute this material, requesters must process their own requests via the RightsLink permission system. Information about how to use the RightsLink permission system can be found at <http://pubs.acs.org/page/copyright/permissions.html>

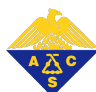

ACS Publications

MOST TRUSTED. MOST CITED. MOST READ.

Copyright © 1998 American Chemical Society

Revised 5-27-98

## Supporting information for:

**Reversible 1,2-Migration of Hydrogen between Platinum  
and Silicon via Intermediate Silylene Complexes**

Gregory P. Mitchell and T. Don Tilley\*

Department of Chemistry

University of California at Berkeley

Berkeley, California 94720-1460

**Experimental Section**

All manipulations were performed under an inert atmosphere using standard Schlenk techniques. Dry, oxygen-free solvents were employed throughout. Diethyl ether, pentane, benzene, benzene- $d_6$ , and toluene- $d_8$  were distilled from sodium/benzophenone and stored under nitrogen. Dichloromethane, dichloromethane- $d_2$ , and MeCN were distilled from  $\text{CaH}_2$  and degassed with two freeze-pump-thaw cycles prior to use. The compounds  $\text{Pt}(\text{PEt}_3)_3$  (Yoshida, T.; Matsuda, T.; Otsuka, S. *Inorg. Synth.* **1988**, 28, 119) and  $(\text{Et}_2\text{O})\text{LiB}(\text{C}_6\text{F}_5)_4$  (Massey, A. G.; Park, A. J. *J. Organomet. Chem.* **1964**, 2, 245), were prepared according to known procedures. Trimethylsilyl trifluoromethanesulfonate,  $\text{Bu}_4\text{NBr}$ ,  $\text{MeMgBr}$  (1.4 M in  $\text{Et}_2\text{O}$ ),  $\text{Bu}_3\text{SnD}$ , pyrazine, AIBN,  $\text{SiCl}_4$ ,  $\text{HSiCl}_3$ , and  $\text{HS}^t\text{Bu}$  were purchased from Aldrich and used as received. Triethylamine was purchased from Aldrich and distilled prior to use. Elemental analyses were performed by Desert Microanalytical Laboratories or the microanalytical laboratory at the University of California, Berkeley. All IR samples were prepared as Nujol mulls on CsI plates unless otherwise indicated and all absorptions are reported in  $\text{cm}^{-1}$ . All NMR spectra were recorded at room temperature in dichloromethane- $d_2$ , unless otherwise noted.

**$\text{HSi}(\text{S}^t\text{Bu})_3$ .** This procedure was originally developed by Daniel Straus and is modified from a procedure described by Grumbine (Grumbine, S. K. Ph.D. Thesis, University of

California, San Diego, 1993). To 100 mL of Et<sub>2</sub>O was added HSiCl<sub>3</sub> (4.0 mL, 39.6 mmol) and HS<sup>t</sup>Bu (15.6 mL, 139 mmol). Four 5 mL portions of NEt<sub>3</sub> (19.3 mL, 139 mmol) were added, generating heat and a white precipitate. The reaction mixture was stirred for 12 h before it was filtered through a medium porosity frit. The precipitate was then extracted with Et<sub>2</sub>O (2 x 50 mL). Solvent was removed under reduced pressure from the combined extractions and previously collected filtrate, leaving a waxy solid. Sublimation of this solid (0.001 torr, 120 °C) gave pure product. Yield 67 % (7.9 g). Anal. Calcd for C<sub>12</sub>H<sub>28</sub>S<sub>3</sub>Si: C, 48.59; H, 9.51. Found: C, 48.47; H, 9.71. Mp 83-87 °C. <sup>1</sup>H NMR (benzene-*d*<sub>6</sub>, 300 MHz): δ 1.47 (s, 27 H, <sup>t</sup>Bu), 6.29 (s, 1 H, SiH). <sup>13</sup>C{<sup>1</sup>H} NMR (benzene-*d*<sub>6</sub>, 125 MHz): δ 34.6 (s, <sup>t</sup>Bu), 47.7 (s, <sup>t</sup>Bu). IR: 2960 s, 2959 s, 2144 m, 1456 s, 1394 w, 1365 s, 1216 w, 1160 w, 771 s, 571 s, 507 w.

***cis*-(PEt<sub>3</sub>)<sub>2</sub>Pt(H)Si(S<sup>t</sup>Bu)<sub>3</sub>.** To a solution of Pt(PEt<sub>3</sub>)<sub>3</sub> (0.315 g, 0.573 mmol) in pentane (5 mL) was added a pentane (10 mL) solution of HSi(S<sup>t</sup>Bu)<sub>3</sub> (0.170 g, 0.573 mmol). The reaction mixture was stirred for 30 min, during which time a white precipitate formed. The solvent was removed under reduced pressure and the residue was washed once with pentane (5 mL). The remaining white powder was then crystallized from diethyl ether at -78 °C. Yield 75% (0.313 g). Anal. Calcd for C<sub>24</sub>H<sub>58</sub>S<sub>3</sub>P<sub>2</sub>PtSi: C, 39.60; H, 8.03. Found: C, 39.82; H, 8.30. Mp 153-157 °C. <sup>1</sup>H NMR (benzene-*d*<sub>6</sub>, 300 MHz): δ -4.05 (dd, <sup>2</sup>J<sub>HP<sub>cis</sub></sub> = 20.4 Hz, <sup>2</sup>J<sub>HP<sub>trans</sub></sub> = 170 Hz, <sup>1</sup>J<sub>HP<sub>t</sub></sub> = 820 Hz, 1 H, PtH), 0.87 (m, 18 H, PEt<sub>3</sub>), 1.50 (m, 6 H, PEt<sub>3</sub>), 1.87 (s, 27 H, <sup>t</sup>Bu), 2.11 (m, 6 H, PEt<sub>3</sub>). <sup>13</sup>C{<sup>1</sup>H} NMR (benzene-*d*<sub>6</sub>, 125 MHz): δ 8.71 (d, <sup>2</sup>J<sub>CP</sub> = 28 Hz, PEt<sub>3</sub>), 19.04 (d, <sup>1</sup>J<sub>CP</sub> = 22 Hz, PEt<sub>3</sub>), 21.95 (d, <sup>1</sup>J<sub>CP</sub> = 21 Hz, PEt<sub>3</sub>), 35.81 (s, <sup>t</sup>Bu), 47.47 (s, <sup>t</sup>Bu). <sup>31</sup>P{<sup>1</sup>H} NMR (benzene-*d*<sub>6</sub>, 121.5 MHz): δ 16.00 (d with <sup>195</sup>Pt satellites, <sup>2</sup>J<sub>PP</sub> = 16.65 Hz, <sup>1</sup>J<sub>PP<sub>t</sub></sub> = 2270 Hz), 18.22 (d with <sup>195</sup>Pt satellites, <sup>1</sup>J<sub>PP<sub>t</sub></sub> = 1735 Hz). <sup>29</sup>Si{<sup>1</sup>H} NMR (59.6 MHz): δ 16.26 (dd with <sup>195</sup>Pt satellites, <sup>2</sup>J<sub>SiP<sub>cis</sub></sub> = 13.8 Hz, <sup>2</sup>J<sub>SiP<sub>trans</sub></sub> = 235 Hz, <sup>1</sup>J<sub>SiPt</sub> = 1963 Hz). IR: 2100 s (PtH), 1250 m, 1210 m, 1150 s, 1040 s, 770 s, 720 s, 630 w, 560 w, 510 m.

***cis*-(PEt<sub>3</sub>)<sub>2</sub>Pt(H)Si(S<sup>t</sup>Bu)<sub>2</sub>OTf (1).** Trimethylsilyl trifluoromethanesulfonate (0.130 g, 0.585 mmol) and **1** (0.280 g, 0.385 mmol) were weighed into separate flasks and each compound was dissolved in 7 mL of dichloromethane. The two solutions were combined and the mixture

was stirred for 8 h, after which time the volatile material was removed *in vacuo*. The white residue was then crystallized from a 1:1 dichloromethane/diethyl ether mixture at -78 °C. Yield 58% (0.169 g). Anal. Calcd for C<sub>21</sub>H<sub>49</sub>S<sub>3</sub>O<sub>3</sub>F<sub>3</sub>P<sub>2</sub>PtSi: C, 32.01; H, 6.27. Found: C, 32.14; H 6.47. Mp 100-102 °C. <sup>1</sup>H NMR (300 MHz): δ -4.77 (dd with <sup>195</sup>Pt satellites, <sup>2</sup>J<sub>HP<sub>cis</sub></sub> = 17.7 Hz, <sup>2</sup>J<sub>HP<sub>trans</sub></sub> = 144 Hz, <sup>1</sup>J<sub>HPt</sub> = 770 Hz, 1 H, PtH), 1.05 (m, 18 H, PEt<sub>3</sub>), 1.53 (s, 18 H, <sup>t</sup>Bu), 1.96 (m, 12 H, PEt<sub>3</sub>). <sup>13</sup>C{<sup>1</sup>H} NMR (75 MHz): δ 8.61 (s, PEt<sub>3</sub>), 18.58 (d, <sup>1</sup>J<sub>CP</sub> = 28 Hz, PEt<sub>3</sub>), 21.55 (d, <sup>1</sup>J<sub>CP</sub> = 27 Hz, PEt<sub>3</sub>), 35.10 (s, <sup>t</sup>Bu), 47.41 (s, <sup>t</sup>Bu). <sup>31</sup>P{<sup>1</sup>H} NMR (121.5 MHz): δ 14.06 (d with <sup>195</sup>Pt satellites, <sup>2</sup>J<sub>PP</sub> = 19.00 Hz, <sup>1</sup>J<sub>PPt</sub> = 2258 Hz), 19.60 (d with <sup>195</sup>Pt satellites, <sup>1</sup>J<sub>PPt</sub> = 1963 Hz). <sup>29</sup>Si{<sup>1</sup>H} NMR (59.6 MHz): δ 52.22 (dd with <sup>195</sup>Pt satellites, <sup>2</sup>J<sub>SiP<sub>cis</sub></sub> = 14.0 Hz, <sup>2</sup>J<sub>SiP<sub>trans</sub></sub> = 260 Hz, <sup>1</sup>J<sub>SiPt</sub> = 1950 Hz). IR: 2925 s, 2064 m (PtH), 1238 m, 1155 m, 1031 s, 947 m, 758 w, 723 w, 634 m.

**Observation of [cis-(PEt<sub>3</sub>)<sub>2</sub>HPt=Si(S<sup>t</sup>Bu)<sub>2</sub>(Et<sub>2</sub>O)][B(C<sub>6</sub>F<sub>5</sub>)<sub>4</sub>] (2).** (Et<sub>2</sub>O)LiB(C<sub>6</sub>F<sub>5</sub>)<sub>4</sub> (10 mg, 0.013 mmol) and **2** (10 mg, 0.013 mmol) were added to an NMR tube. Dichloromethane-*d*<sub>2</sub> (ca. 0.5 mL) was condensed into the tube under vacuum at -196 °C. The solution was then warmed to -78 °C and was shaken until all the reactants had dissolved. The tube was then lowered into the NMR probe, which had previously been cooled to -80 °C. <sup>1</sup>H NMR (300 MHz, -80 °C): δ -5.35 (dd, <sup>2</sup>J<sub>HP<sub>cis</sub></sub> = 17.4 Hz, <sup>2</sup>J<sub>HP<sub>trans</sub></sub> = 139 Hz, <sup>1</sup>J<sub>HPt</sub> = 750 Hz, 1 H, PtH), 0.95 (m, PEt<sub>3</sub>), 1.09 (t, <sup>3</sup>J<sub>HH</sub> = 6.9 Hz, Et<sub>2</sub>O), 1.46 (s, <sup>t</sup>Bu), 1.89 (br m, PEt<sub>3</sub>), 3.41 (br s, free Et<sub>2</sub>O), 4.55 (br s, bound Et<sub>2</sub>O). <sup>31</sup>P{<sup>1</sup>H} NMR (-50 °C, 121.5 MHz): δ 10.90 (d <sup>195</sup>Pt satellites, <sup>2</sup>J<sub>PP</sub> = 20.6 Hz, <sup>1</sup>J<sub>PPt</sub> = 2231 Hz), 15.40 (<sup>1</sup>J<sub>PPt</sub> = 2044 Hz). <sup>29</sup>Si{<sup>1</sup>H} NMR (-60 °C, 99.3 MHz): δ 86.30 (d with <sup>195</sup>Pt satellites, <sup>2</sup>J<sub>SiP<sub>trans</sub></sub> = 253 Hz (<sup>2</sup>J<sub>SiP<sub>cis</sub></sub> not observed), <sup>1</sup>J<sub>SiPt</sub> = 1986 Hz).

**Observation of [(PEt<sub>3</sub>)<sub>2</sub>PtSiH(S<sup>t</sup>Bu)<sub>2</sub>][B(C<sub>6</sub>F<sub>5</sub>)<sub>4</sub>] (3).** To an NMR tube were added **1** (10 mg, 0.013 mmol), (Et<sub>2</sub>O)LiB(C<sub>6</sub>F<sub>5</sub>)<sub>4</sub> (10 mg, 0.013 mmol) and 0.5 mL of dichloromethane-*d*<sub>2</sub>. After shaking, the formation of a cloudy white precipitate and a light yellow solution were noted. <sup>1</sup>H NMR (-30 °C): δ 1.10 (m, 18 H, PEt<sub>3</sub>), 1.46 (s, 9H, <sup>t</sup>Bu), 1.51 (s, 9H, <sup>t</sup>Bu), 2.02 (br m, 12 H, PEt<sub>3</sub>), 5.41 (d, <sup>3</sup>J<sub>HP<sub>trans</sub></sub> = 7.8 Hz, <sup>2</sup>J<sub>HPt</sub> = 110 Hz (<sup>3</sup>J<sub>HP<sub>cis</sub></sub> not observed), SiH). <sup>13</sup>C{<sup>1</sup>H} NMR (125 MHz): δ 8.5 (br s, PEt<sub>3</sub>), 8.8 (br s, PEt<sub>3</sub>), 19.0 (br s, PEt<sub>3</sub>), 21.8 (br s, PEt<sub>3</sub>), 34.8 (br s,

<sup>t</sup>Bu), 35.3 (s, <sup>t</sup>Bu), 136.0 (br s, B(C<sub>6</sub>F<sub>5</sub>)<sub>4</sub>), 137.9 (br s, B(C<sub>6</sub>F<sub>5</sub>)<sub>4</sub>), 139.8 (br s, B(C<sub>6</sub>F<sub>5</sub>)<sub>4</sub>), 147.0 (br s, B(C<sub>6</sub>F<sub>5</sub>)<sub>4</sub>), 149.1 (br s, B(C<sub>6</sub>F<sub>5</sub>)<sub>4</sub>). <sup>31</sup>P{<sup>1</sup>H} NMR ( -20 °C, 121.5 MHz, chloroform-*d*): δ 21.59 (<sup>2</sup>J<sub>PP</sub> = 5.7 Hz, <sup>1</sup>J<sub>PPt</sub> = 2335 Hz), 22.46 (<sup>1</sup>J<sub>PPt</sub> = 4086 Hz). <sup>29</sup>Si{<sup>1</sup>H} NMR (-30 °C, 99.3 MHz): δ 23.59 (dd with <sup>195</sup>Pt satellites, <sup>2</sup>J<sub>SiP</sub> = 152, <sup>2</sup>J<sub>SiP</sub> = 252 Hz, <sup>1</sup>J<sub>SiPt</sub> = 865 Hz).

***trans*-(PEt<sub>3</sub>)<sub>2</sub>MePtSiH(S<sup>t</sup>Bu)<sub>2</sub> (4).** To a cold (0 °C) Schlenk flask containing **1** (0.300 g, 0.381 mmol) and (Et<sub>2</sub>O)LiB(C<sub>6</sub>F<sub>5</sub>)<sub>4</sub> (0.290 g, 0.381 mmol) was added 20 mL Et<sub>2</sub>O. Compound **6** separated as a pale yellow oil over a period of 3 minutes. To this mixture was added MeMgBr (0.270 mL, 0.380 mmol) via syringe. The mixture was stirred for 15 min, during which time the oil became a fluffy precipitate. The volatiles were removed *in vacuo* and the residue was extracted with pentane (2 x 10 mL). Removal of the pentane from the combined extracts under reduced pressure gave **7** as an off white powder. Yield 40 % (0.109 g). Anal. Calcd for C<sub>21</sub>H<sub>52</sub>P<sub>2</sub>S<sub>2</sub>PtSi: C, 38.57; H, 8.02. Found: C, 38.31; H, 8.01. mp 163-165 °C (dec). <sup>1</sup>H NMR (400 MHz): δ 0.46 (t with <sup>195</sup>Pt satellites, <sup>2</sup>J<sub>HPt</sub> = 48.0 Hz, <sup>3</sup>J<sub>HP</sub> = 6.0 Hz, 3 H, PtMe), 0.96 (m, 18 H, PEt<sub>3</sub>), 1.70 (s, 18 H, <sup>t</sup>Bu), 2.00 (br s, 12 H, PEt<sub>3</sub>), 5.93 (t with <sup>195</sup>Pt satellites, <sup>2</sup>J<sub>HPt</sub> = 50.8 Hz, <sup>3</sup>J<sub>HP</sub> = 17.2 Hz, 1 H, SiH). <sup>13</sup>C{<sup>1</sup>H} NMR (100 MHz): δ 5.6 (m, PEt<sub>3</sub>), 10.4 (t with <sup>195</sup>Pt satellites, <sup>1</sup>J<sub>CPt</sub> = 1094 Hz, <sup>2</sup>J<sub>CP</sub> = 19.1 Hz), 13.8 (m, PEt<sub>3</sub>), 35.8 (s, <sup>t</sup>Bu), 49.3 (s, <sup>t</sup>Bu). <sup>31</sup>P{<sup>1</sup>H} NMR (161.98 MHz): δ 9.15 (s with <sup>195</sup>Pt satellites, <sup>1</sup>J<sub>PPt</sub> = 2670 Hz). IR (KBr pellet): 2965 s, 2051 m (PtH), 1455 m, 1359 m, 1260 m, 1032 s, 799 m, 764 s, 720 m, 491 w.

***cis*-(PEt<sub>3</sub>)<sub>2</sub>BrPtSiH(S<sup>t</sup>Bu)<sub>2</sub> (5).** Compound **3** was generated in the same manner as for **4**. To this mixture was added via cannula Bu<sub>4</sub>NBr (0.123 g, 0.380 mmol) dissolved in 10 mL of dichloromethane. The mixture was stirred for 2 h, after which time the volatiles were removed *in vacuo* and the residue was extracted with Et<sub>2</sub>O (2 x 10 mL). Concentration to half volume under reduced pressure and cooling to -80 °C gave **5** as an off white powder. Yield 85 % (0.233 g). Anal. Calcd for C<sub>20</sub>H<sub>49</sub>P<sub>2</sub>S<sub>2</sub>BrPtSi: C, 33.42; H, 6.87. Found: C, 33.25; H, 6.50. mp 175-178 °C (dec). <sup>1</sup>H NMR (400 MHz): δ 1.03 (br s, 18 H, PEt<sub>3</sub>), 1.60 (s, 18 H, <sup>t</sup>Bu), 2.11 (br s, PEt<sub>3</sub>), 2.35 (br s, PEt<sub>3</sub>), 5.31 (vir t with <sup>195</sup>Pt satellites, <sup>2</sup>J<sub>HPt</sub> = 111 Hz, 1 H, SiH). <sup>13</sup>C{<sup>1</sup>H} NMR (100 MHz): δ 6.2 (m, PEt<sub>3</sub>), 14.1 (m, PEt<sub>3</sub>), 32.5 (s, <sup>t</sup>Bu), 50.3 (s, <sup>t</sup>Bu). <sup>31</sup>P{<sup>1</sup>H} NMR (161.98 MHz):

$\delta$  11.84 (s with  $^{195}\text{Pt}$  satellites,  $^1J_{\text{PPt}} = 2510$  Hz), 13.04 (s with  $^{195}\text{Pt}$  satellites,  $^1J_{\text{PPt}} = 2834$  Hz). IR (KBr pellet): 2986 s, 2062 m (PtH), 1478 m, 1434 m, 1375 m, 1271 s, 1142 m, 1091 s, 934 m, 850 w, 721 w, 648 w.

**Observation of *cis*-( $\text{PEt}_3$ ) $_2$ Pt(NCMe)SiH(S $^t$ Bu) $_2$ ][OTf] (6).** To a solution of **1** (0.015 g, 0.019 mmol) in 0.5 mL dichloromethane- $d_2$  was added MeCN (300  $\mu\text{L}$ , 5.54 mmol).  $^1\text{H}$  NMR (400 MHz, 25  $^\circ\text{C}$ ):  $\delta$  1.09 (m,  $\text{PEt}_3$ ), 1.46 (s, 18 H,  $^t\text{Bu}$ ), 2.11 (br s,  $\text{PEt}_3$ ), 4.90 (vir t with  $^{195}\text{Pt}$  satellites,  $^2J_{\text{HPt}} = 109$  Hz, 1 H, SiH) (coordinated MeCN signal was obscured by free MeCN).  $^{31}\text{P}\{^1\text{H}\}$  NMR (121.5 MHz, 25  $^\circ\text{C}$ ):  $\delta$  16.88 (br s with  $^{195}\text{Pt}$  satellites,  $^1J_{\text{PPt}} = 2589$  Hz).  $^{31}\text{P}\{^1\text{H}\}$  NMR (121.5 MHz, -20  $^\circ\text{C}$ ):  $\delta$  16.57 (s with  $^{195}\text{Pt}$  satellites,  $^1J_{\text{PPt}} = 2538$  Hz), 16.87 (s with  $^{195}\text{Pt}$  satellites,  $^1J_{\text{PPt}} = 2595$  Hz). IR (MeCN solution): 2969 s, 2939 s, 2098 m (SiH), 1454 s, 1421 s, 1363 m, 1259 s, 1266 m, 1160 s, 1031 m, 860 w, 765 m, 725 m, 640 m, 754 w, 518 m, 414 w.

***cis*-( $\text{PEt}_3$ ) $_2$ Pt(D)Si(S $^t$ Bu) $_3$ .** This procedure is based on a previously reported preparation of  $\text{HSiCl}_3$  (Pätzold, U.; Roewer, G.; Herzog, U. *J. Organomet. Chem.* **1996**, 508, 147). To a mixture of pyrazine (0.295 g, 3.7 mmol),  $\text{Bu}_3\text{SnD}$  (1.00 mL, 3.7 mmol), and AIBN (0.020 g, 0.12 mmol) in 15 mL benzene was added  $\text{SiCl}_4$  (0.42 mL, 3.7 mmol) via syringe. After stirring for 8 h,  $\text{HS}^t\text{Bu}$  (1.7 mL, 15 mmol) and  $\text{NEt}_3$  (2.1 mL, 15 mmol) were added successively via syringe, generating a copious quantity of white precipitate. The mixture was stirred for an additional 8 h and then filtered. The precipitate was extracted with benzene (2 x 10 mL) and the extractions were then combined with the filtrate. Removal of the solvent under reduced pressure yielded a clear colorless oil, which was dissolved in pentane (10 mL) and then combined with a solution of  $\text{Pt}(\text{PEt}_3)$  (1.00 g, 1.8 mmol) in 10 mL pentane. The reaction mixture was stirred for 30 min, during which time a white precipitate formed. Removal of the solvent under reduced pressure yielded a light yellow powder, which was washed once with pentane (5 mL). The remaining white powder was then crystallized from diethyl ether at -78  $^\circ\text{C}$ . Yield 24% based on  $\text{Bu}_3\text{SnD}$  (0.642 g).  $^1\text{H}$  NMR (benzene- $d_6$ , 300 MHz):  $\delta$  0.92 (m, 18 H,  $\text{PEt}_3$ ), 1.51 (m, 6 H,  $\text{PEt}_3$ ), 1.85 (s, 27 H,  $^t\text{Bu}$ ), 2.10 (m, 6 H,  $\text{PEt}_3$ ).  $^{31}\text{P}\{^1\text{H}\}$  NMR (dichloromethane- $d_2$ , 161.98 MHz):  $\delta$  14.44 (dt

with  $^{195}\text{Pt}$  satellites,  $^2J_{\text{PP}} = 17.00$  Hz,  $^2J_{\text{PD}} = 23.00$  Hz,  $^1J_{\text{PPt}} = 2219$  Hz), 18.22 (d with  $^{195}\text{Pt}$  satellites,  $^1J_{\text{PPt}} = 1749$  Hz). IR: 2968 s, 1508 s (PtD), 1250 m, 1210 m, 1150 s, 1040 s, 770 s, 720 s, 630 w, 560 w, 510 m.

***cis*-(PEt<sub>3</sub>)<sub>2</sub>DPTSi(S<sup>t</sup>Bu)<sub>2</sub>OTf.** The procedure employed was identical to that for **1**, except for the use of *cis*-(PEt<sub>3</sub>)<sub>2</sub>Pt(D)Si(S<sup>t</sup>Bu)<sub>3</sub> instead of *cis*-(PEt<sub>3</sub>)<sub>2</sub>Pt(H)Si(S<sup>t</sup>Bu)<sub>3</sub>.  $^1\text{H}$  NMR (300 MHz):  $\delta$  1.08 (m, 18 H, PEt<sub>3</sub>), 1.53 (s, 18 H, <sup>t</sup>Bu), 1.88 (m, 6 H, PEt<sub>3</sub>), 2.00 (m, 6 H, PEt<sub>3</sub>).  $^{31}\text{P}\{^1\text{H}\}$  NMR (121.5 MHz):  $\delta$  14.37 (q with  $^{195}\text{Pt}$  satellites,  $^2J_{\text{PP}} = 19.4$  Hz,  $^2J_{\text{PD}} = 19.4$  Hz,  $^1J_{\text{PPt}} = 2260$  Hz), 19.85 (d with  $^{195}\text{Pt}$  satellites,  $^1J_{\text{PPt}} = 1959$  Hz). IR: 2925 s, 1483 m (PtD), 1238 m, 1155 m, 1031 s, 947 m, 758 w, 723 w, 634 m.

**Rate Dependence on [CH<sub>3</sub>CN].** In a glove box, a standard solution of CH<sub>3</sub>CN (151.8 mg, 3.698 mmol) in dichloromethane-*d*<sub>2</sub> was prepared using a 1.00 mL volumetric flask. A standard solution of **1** (0.0201 g, 0.0255 mmol) in dichloromethane-*d*<sub>2</sub> was similarly prepared and placed in a greaseless Schlenk flask. A total of five NMR tubes were prepared with the following quantities of CH<sub>3</sub>CN solution: 15  $\mu\text{L}$ , 75  $\mu\text{L}$ , 150  $\mu\text{L}$ , 225  $\mu\text{L}$ , and 295  $\mu\text{L}$ . The appropriate quantity of dichloromethane-*d*<sub>2</sub> was added to each tube to bring the total volume to 500  $\mu\text{L}$ . Outside of the glove box, the NMR tubes were cooled to -78 °C and 200  $\mu\text{L}$  standard solution of **1** was added to each via syringe through a septum. Each sample was kept at -78 °C until insertion into the pre-cooled (10 °C) NMR probe and each reaction was monitored by  $^1\text{H}$  NMR spectroscopy for 3 hours. The NMR spectroscopic data were acquired with one scan and without sample spinning. Relative quantities of starting material and product were determined by integration of the <sup>t</sup>Bu region of the  $^1\text{H}$  NMR spectrum. Initial (< 10 % completion) rate constants obtained in the order of lowest [CH<sub>3</sub>CN] to highest were:  $1.7 \times 10^{-4} \text{ s}^{-1}$ ,  $1.4 \times 10^{-4} \text{ s}^{-1}$ ,  $1.3 \times 10^{-4} \text{ s}^{-1}$ ,  $1.4 \times 10^{-4} \text{ s}^{-1}$ ,  $1.5 \times 10^{-4} \text{ s}^{-1}$ . Approach to equilibrium plots are given below (Figures 1-5).

**Kinetic Isotope Effect Determination.** Two portions of **1**, each consisting of 5.0 mg (0.0063 mmol), were weighed into NMR tubes and each were dissolved in 700  $\mu\text{L}$  dichloromethane-*d*<sub>2</sub>. Two solutions of **1-d** were similarly prepared. The NMR tubes were cooled to -78 °C and CH<sub>3</sub>CN (6  $\mu\text{L}$ , 0.11 mmol) was added to each via syringe through a septum. The

reactions were monitored as before at 10 °C. Average  $k_{\text{init}}$  values: **1**,  $1.3 \times 10^{-4} \text{ s}^{-1}$ ; **1-d**,  $1.0 \times 10^{-4} \text{ s}^{-1}$ . Initial rate plots are given below (Figures 6-9).

**Rate Dependence on [OTf] at Constant Ionic Strength.** NMR samples in 700  $\mu\text{L}$  dichloromethane- $d_2$  were prepared as follows. Sample 1:  $[\text{Bu}_4\text{N}][\text{OTf}]$  (generated from  $\text{Bu}_4\text{NBr}$  and  $\text{AgOTf}$  in dichloromethane) (0.012 g, 0.031 mmol), **1** (0.005 g, 0.006 mmol). Sample 2:  $[\text{Bu}_4\text{N}][\text{OTf}]$  (0.007 g, 0.018 mmol),  $[\text{Bu}_4\text{N}][\text{B}(\text{C}_6\text{F}_5)_4]$  (generated from  $\text{Bu}_4\text{NBr}$  and  $(\text{Et}_2\text{O})\text{LiB}(\text{C}_6\text{F}_5)_4$  in dichloromethane) (0.012 g, 0.013 mmol), **1** (0.005 g, 0.006 mmol). Sample 3:  $[\text{Bu}_4\text{N}][\text{OTf}]$  (0.002 g, 0.006 mmol),  $[\text{Bu}_4\text{N}][\text{B}(\text{C}_6\text{F}_5)_4]$  (0.023 g, 0.025 mmol), **1** (0.005 g, 0.006 mmol). The NMR tubes were cooled to -78 °C and  $\text{CH}_3\text{CN}$  (6  $\mu\text{L}$ , 0.11 mmol) was added to each via syringe through a septum. The reactions were monitored as before at 10 °C.  $k_{\text{init}}$  values: Sample 1,  $2.1 \times 10^{-4} \text{ s}^{-1}$ ; Sample 2,  $1.9 \times 10^{-4} \text{ s}^{-1}$ ; Sample 3,  $2.2 \times 10^{-4} \text{ s}^{-1}$ . Approach to equilibrium plots are given below (Figures 10-12).



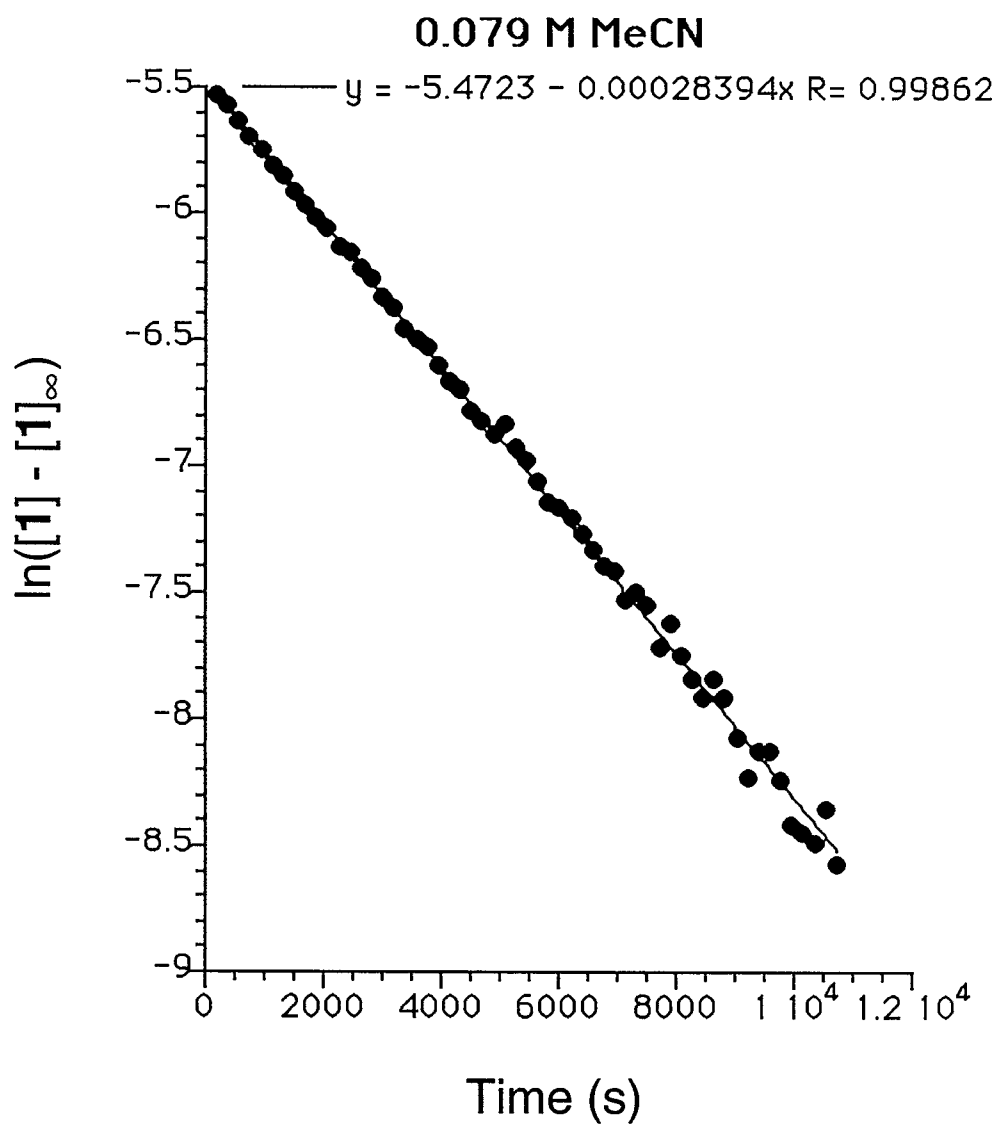

Figure 1. Plot of  $\ln([1] - [1]_{\infty})$  vs. time in the reaction of **1** with MeCN (0.079 M).

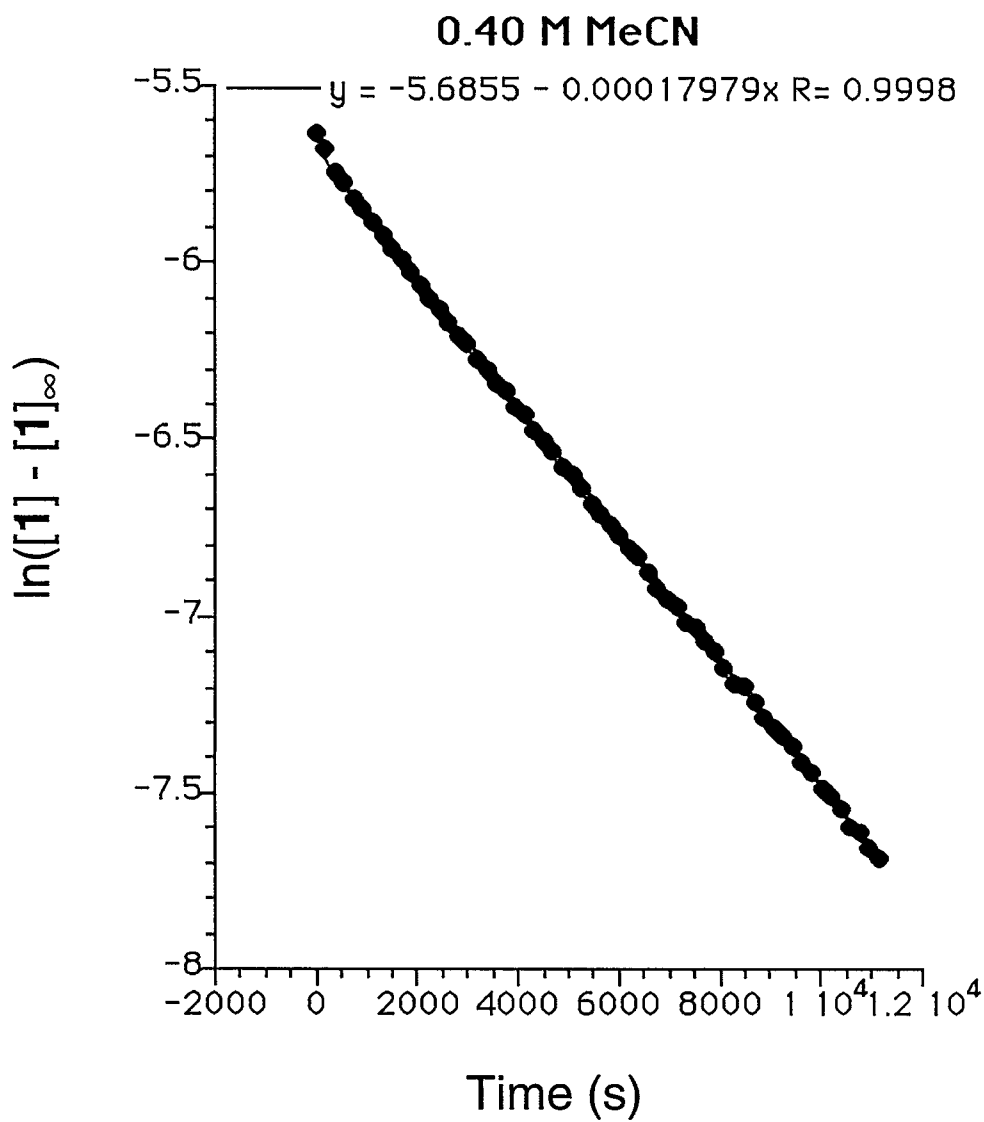

Figure 2. Plot of  $\ln([1] - [1]_{\infty})$  vs. time in the reaction of **1** with MeCN (0.40 M).

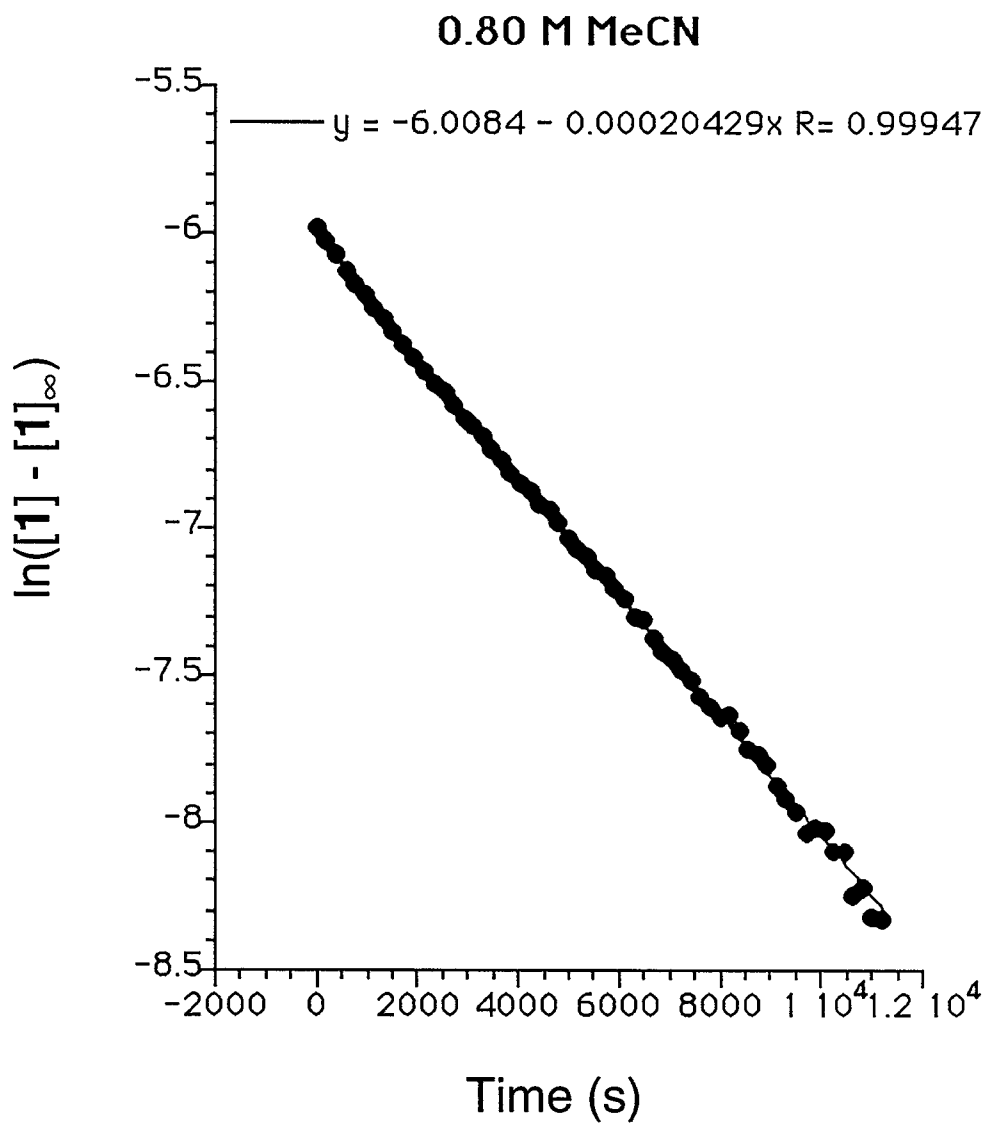

Figure 3. Plot of  $\ln([1] - [1]_{\infty})$  vs. time in the reaction of **1** with MeCN (0.80 M).

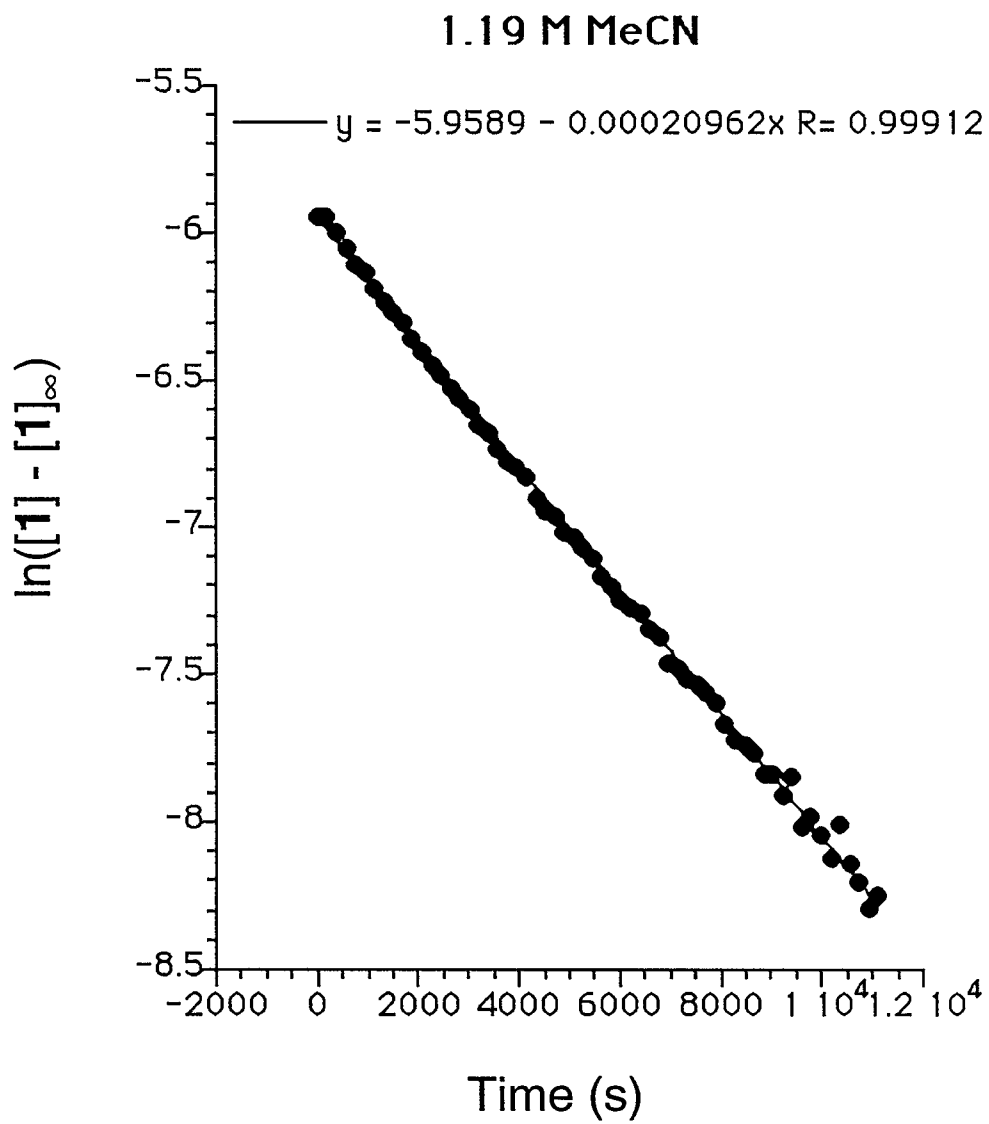

Figure 4. Plot of  $\ln([1] - [1]_{\infty})$  vs. time in the reaction of **1** with MeCN (1.19 M).

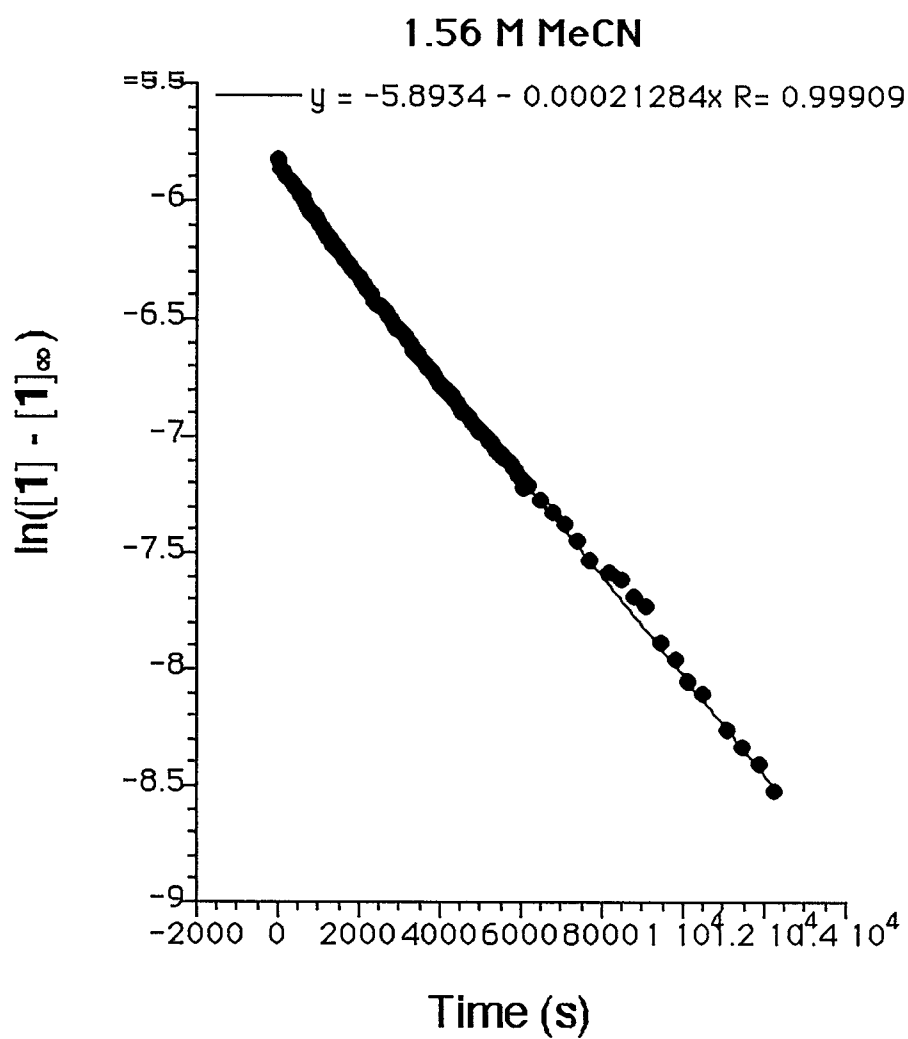

Figure 5. Plot of  $\ln([1] - [1]_{\infty})$  vs. time in the reaction of **1** with MeCN (1.56 M).

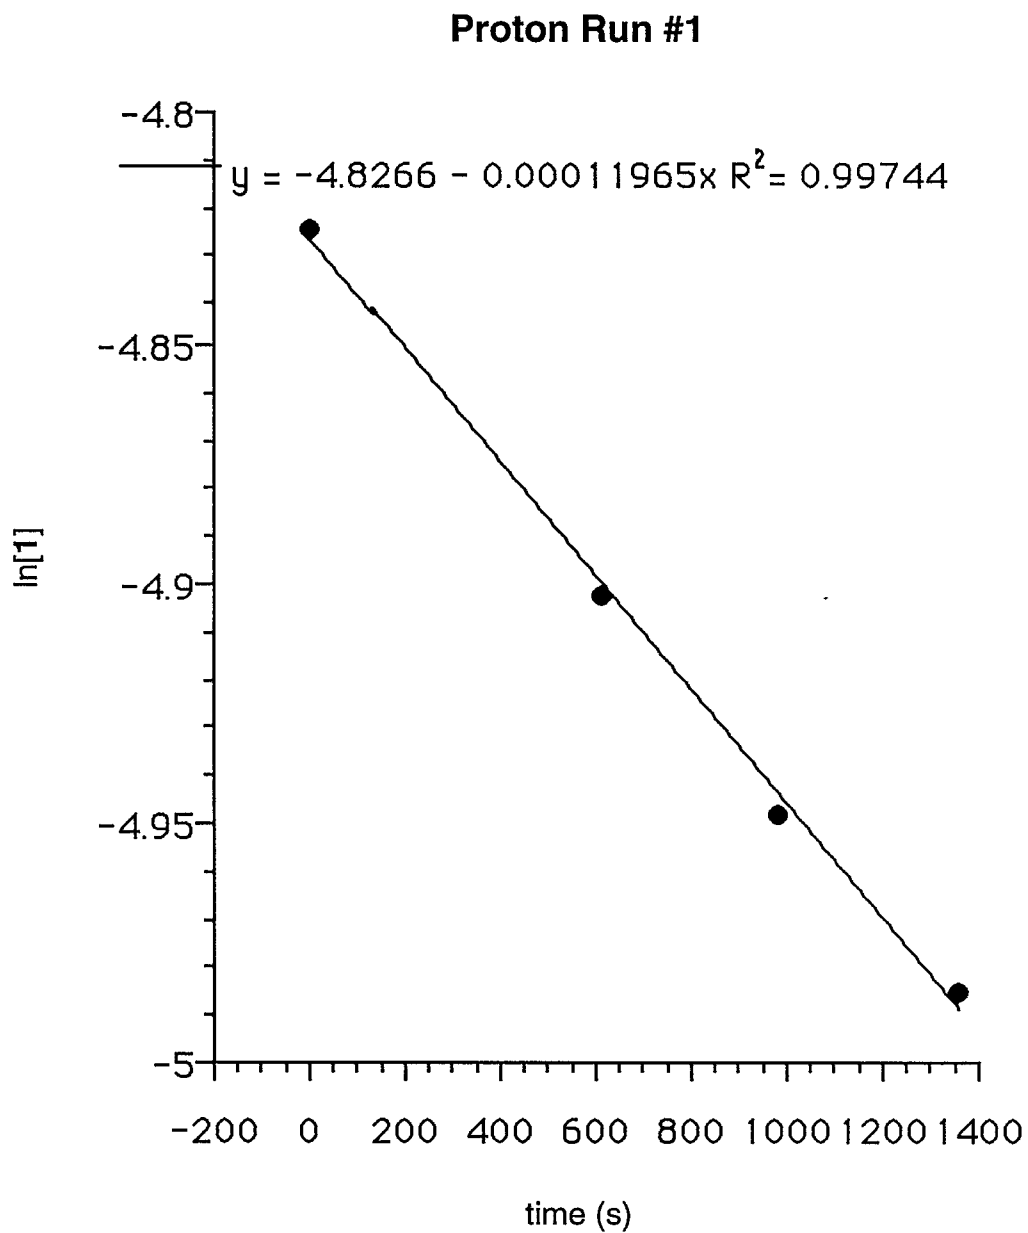

Figure 6. Plot of ln[1] vs. time in the reaction of **1** with MeCN (< 10% completion).

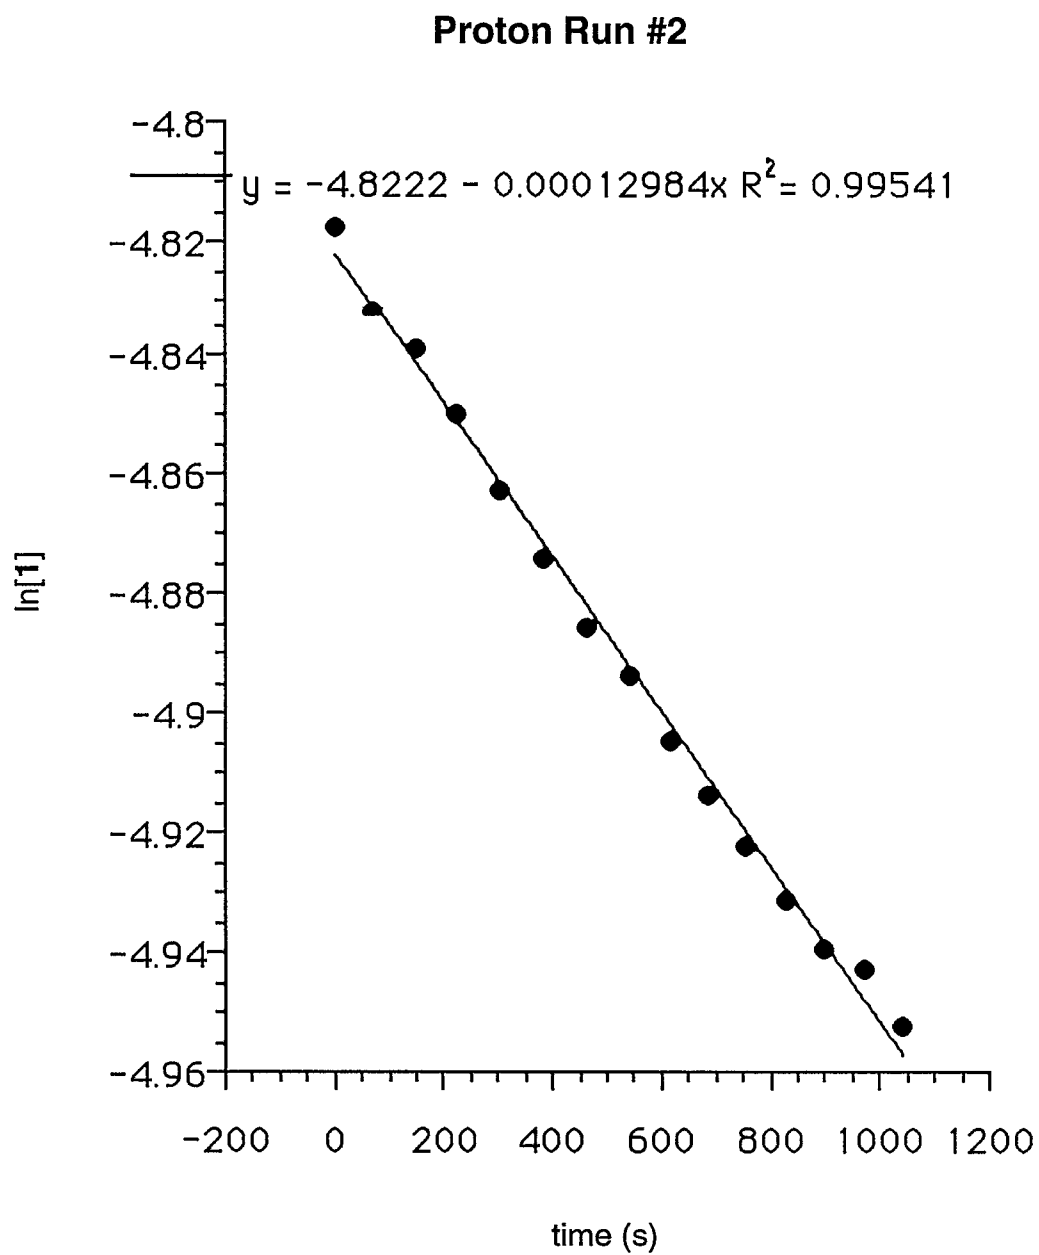

Figure 7. Plot of  $\ln[1]$  vs. time in the reaction of **1** with MeCN (< 10% completion).

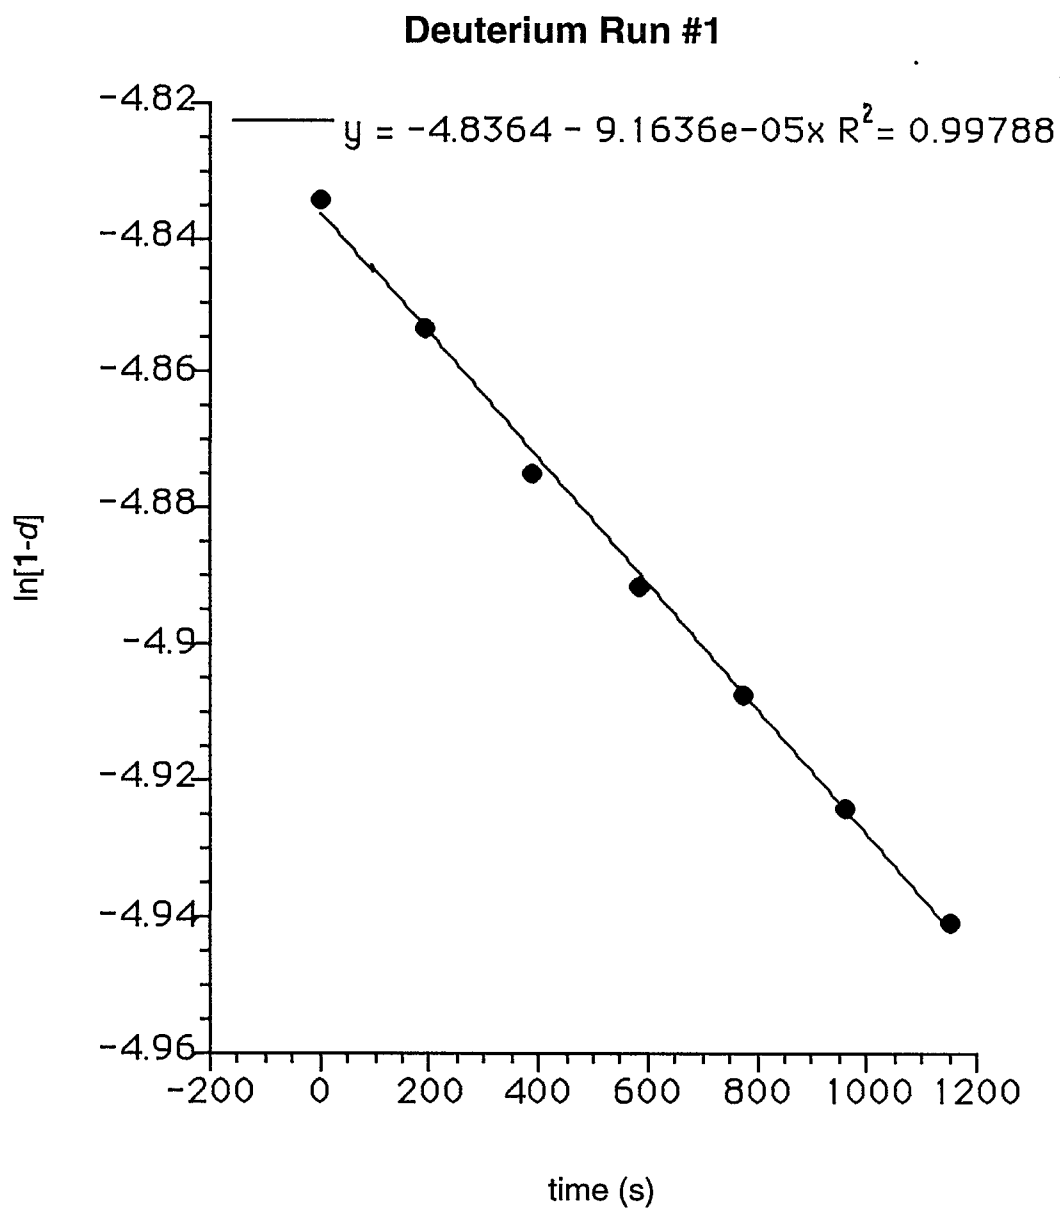

Figure 8. Plot of  $\ln[1-d]$  vs. time in the reaction of **1-d** with MeCN (< 10% completion).



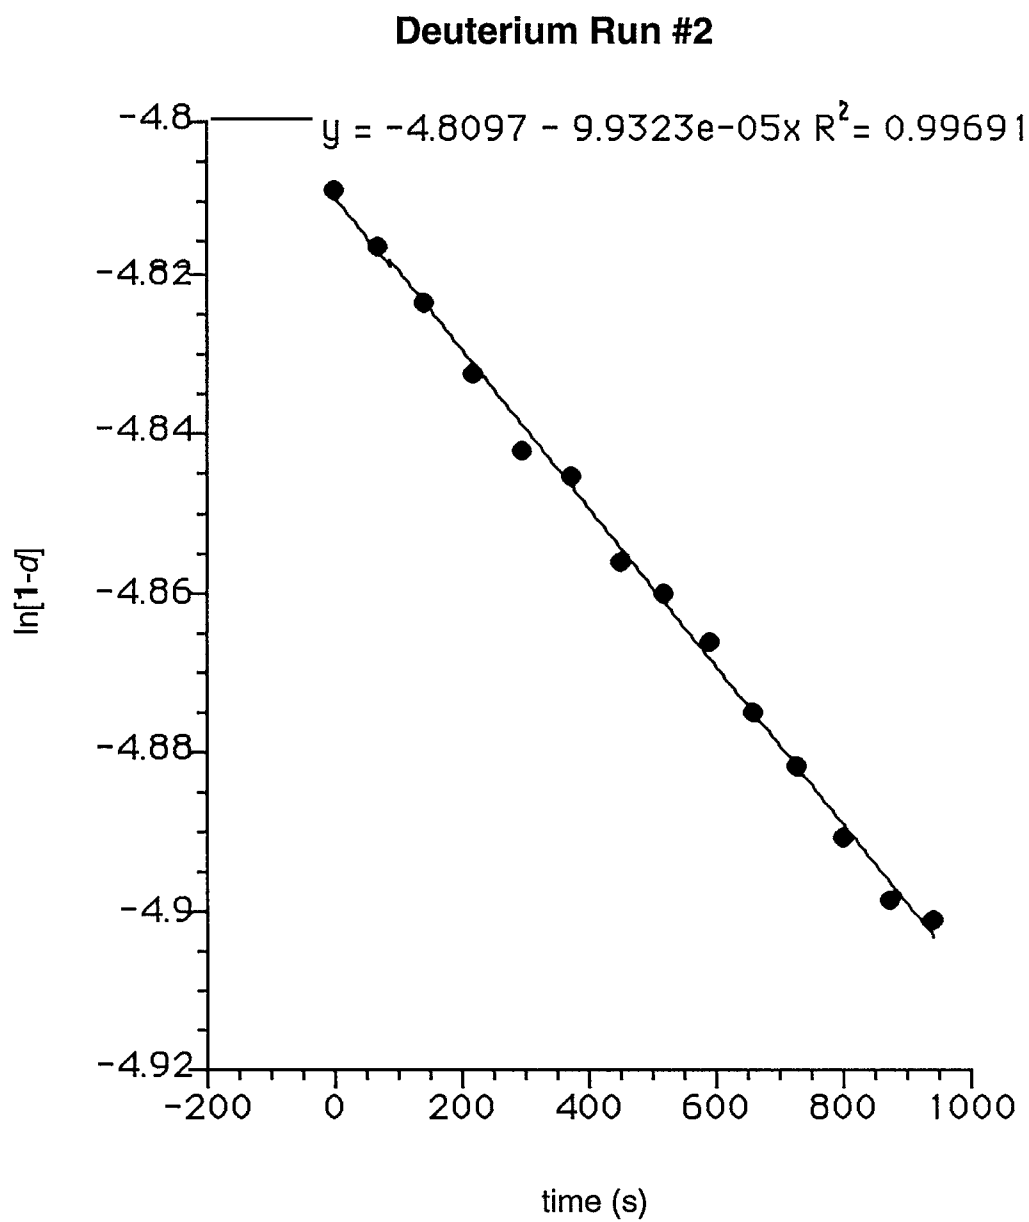

Figure 9. Plot of  $\ln[1-d]$  vs. time in the reaction of **1-d** with MeCN (< 10% completion).

POOR QUALITY ORIGINAL

17

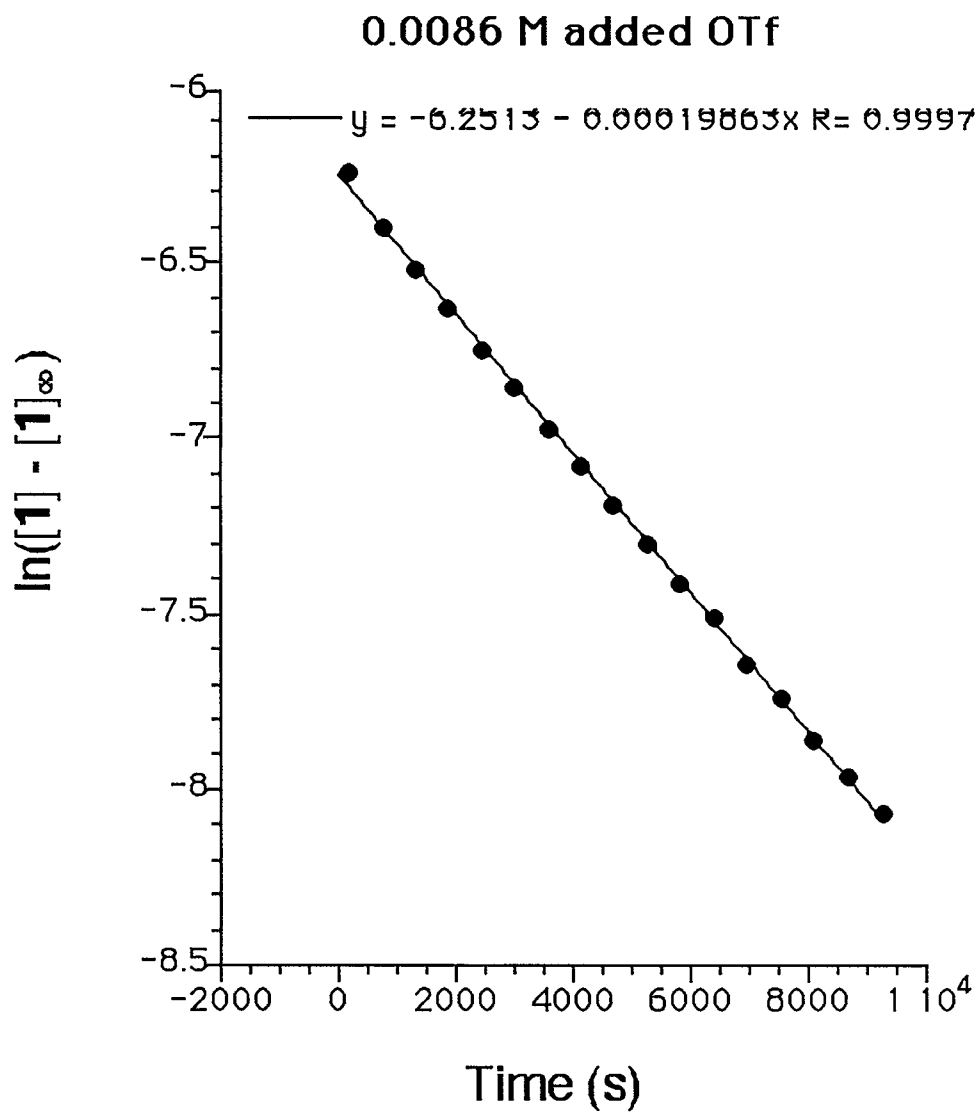

Figure 10. Plot of  $\ln([1] - [1]_{\infty})$  vs. time in the reaction of **1** with MeCN in the presence of 0.0086 M  $[\text{Bu}_4\text{N}][\text{OTf}]$ .

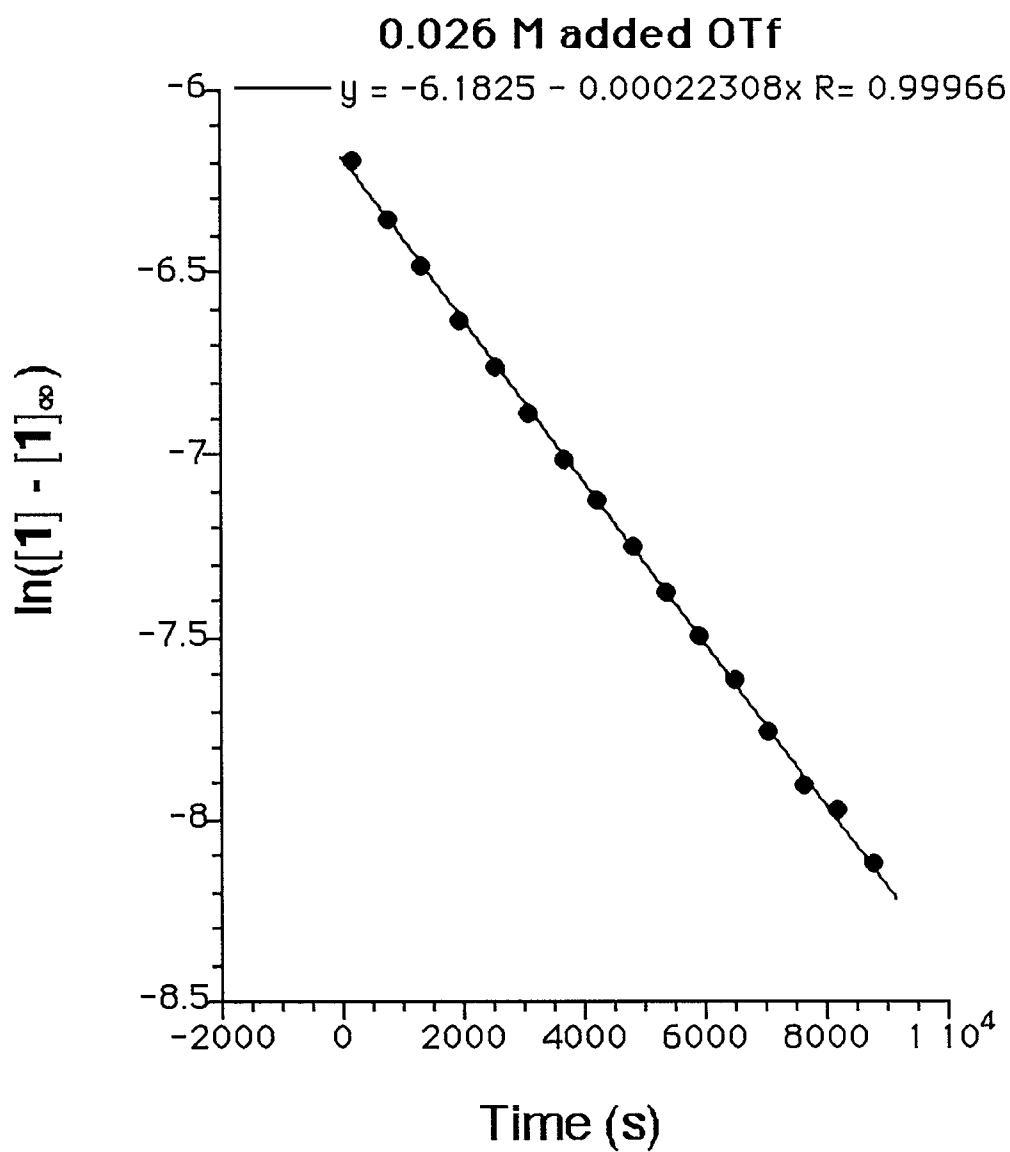

Figure 11. Plot of  $\ln([1] - [1]_{\infty})$  vs. time in the reaction of **1** with MeCN in the presence of 0.026 M  $[\text{Bu}_4\text{N}][\text{OTf}]$ .

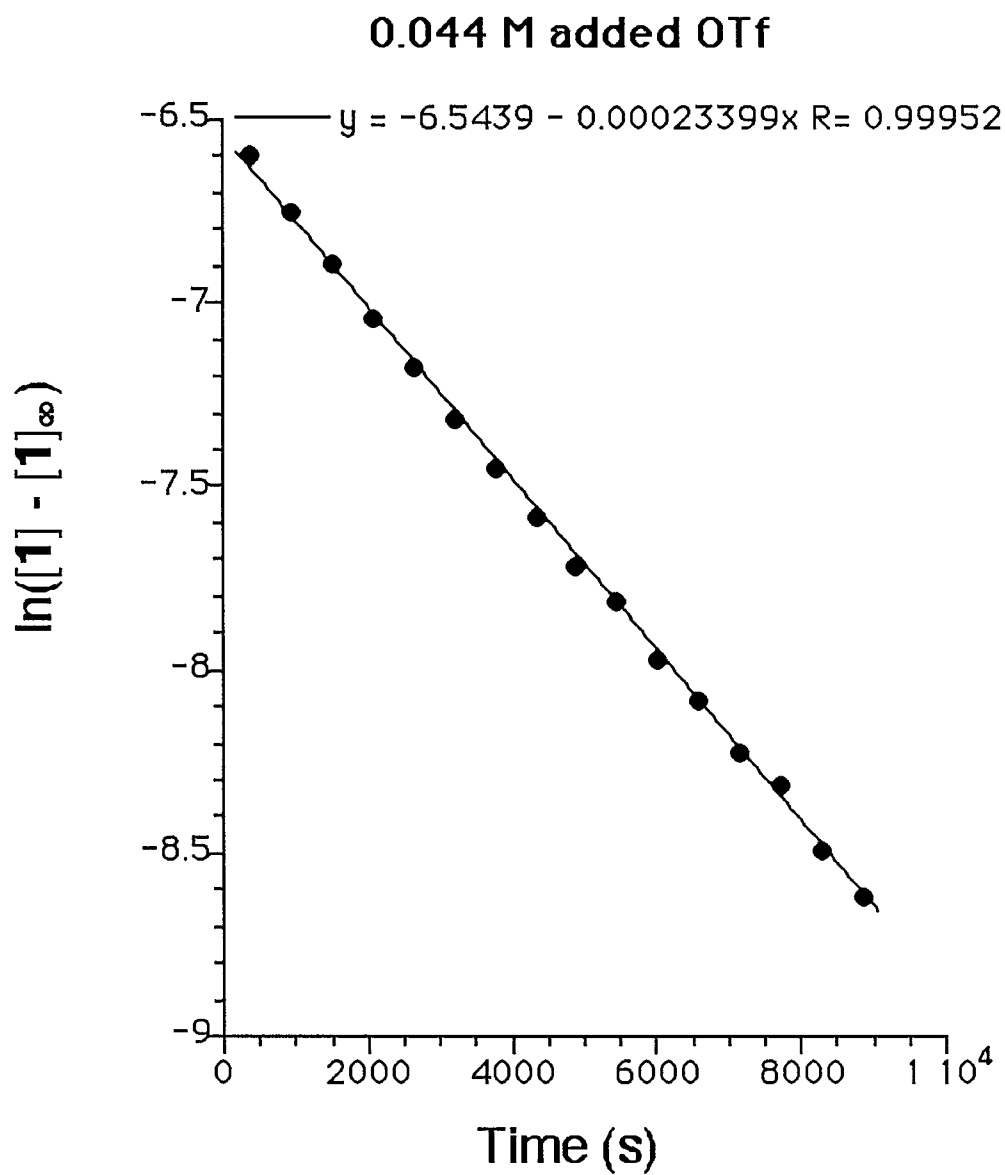

Figure 10. Plot of  $\ln([1] - [1]_{\infty})$  vs. time in the reaction of **1** with MeCN in the presence of 0.044 M  $[\text{Bu}_4\text{N}][\text{OTf}]$ .
